# Supplementary material
Source: PubMed Central journal article supplement (PMC4699408)
Supplement: i1552-5783-56-13-8340-s01.pdf [file i1552-5783-56-13-8340-s01.pdf]

Yañez-Soto et al.

SUPPLEMENTARY MATERIAL:

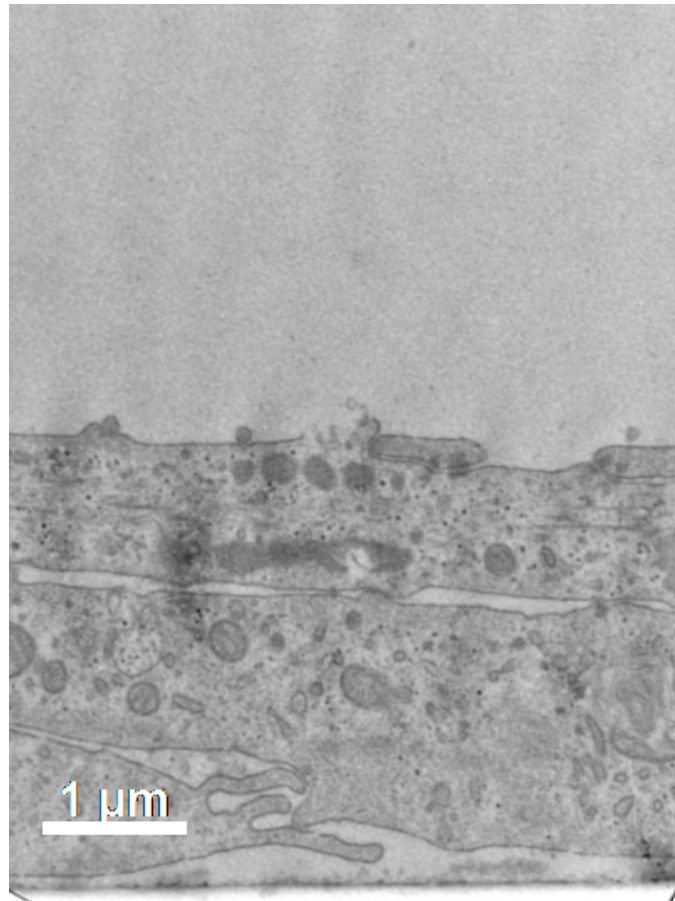

**Figure S1:** Transmission Electronic micrograph of cells cultured in Stratifying Medium for three days

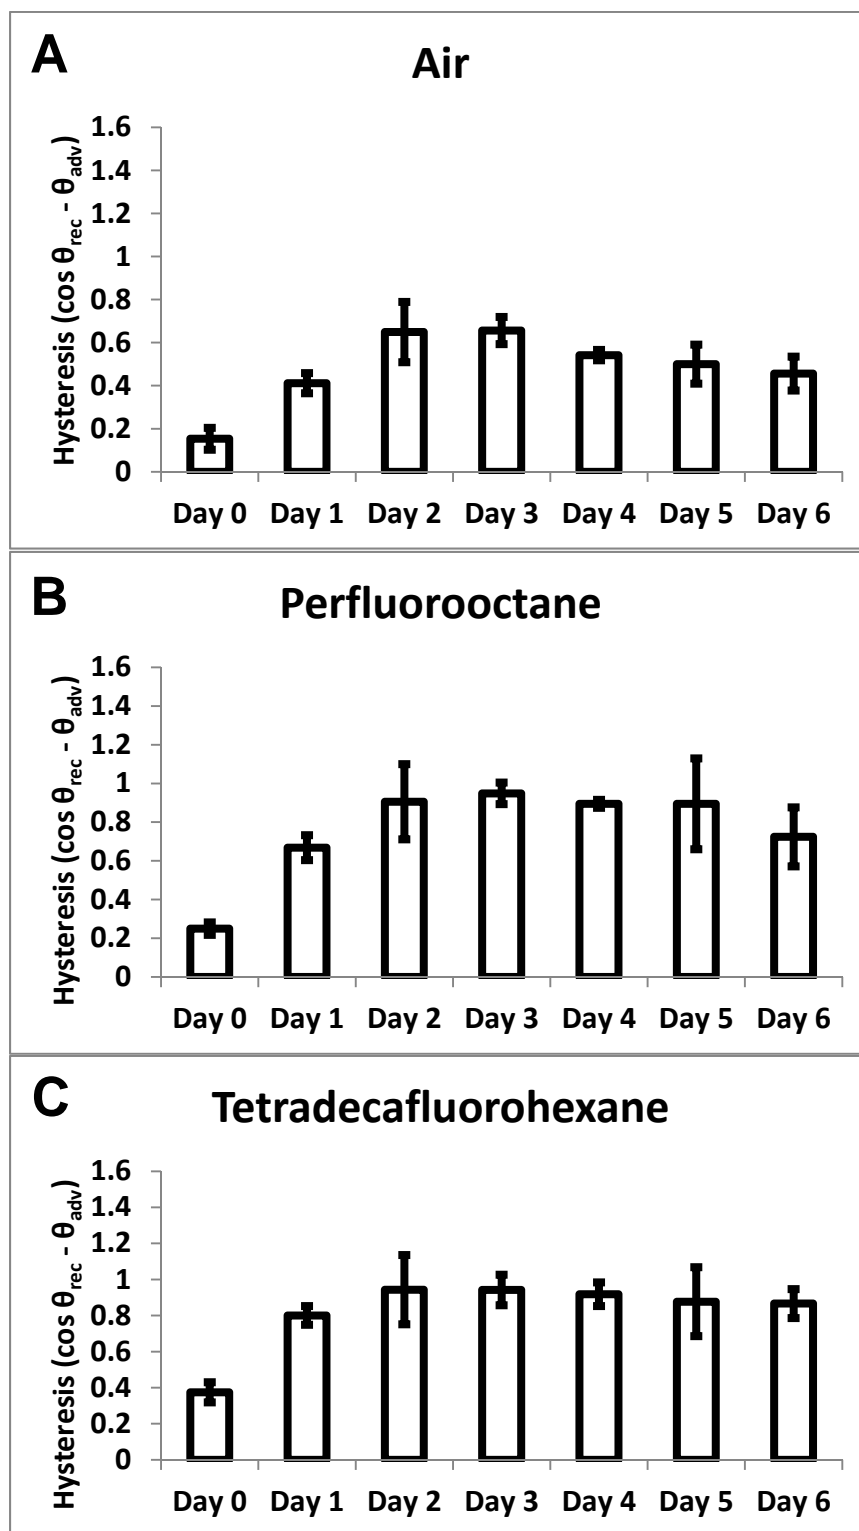

**Figure S2.** Hysteresis ( $\cos \theta_{rec} - \cos \theta_{adv}$ ) using A) air bubble, B) Perfluorooctane and C) Tetradecafluorohexane as the immiscible phase

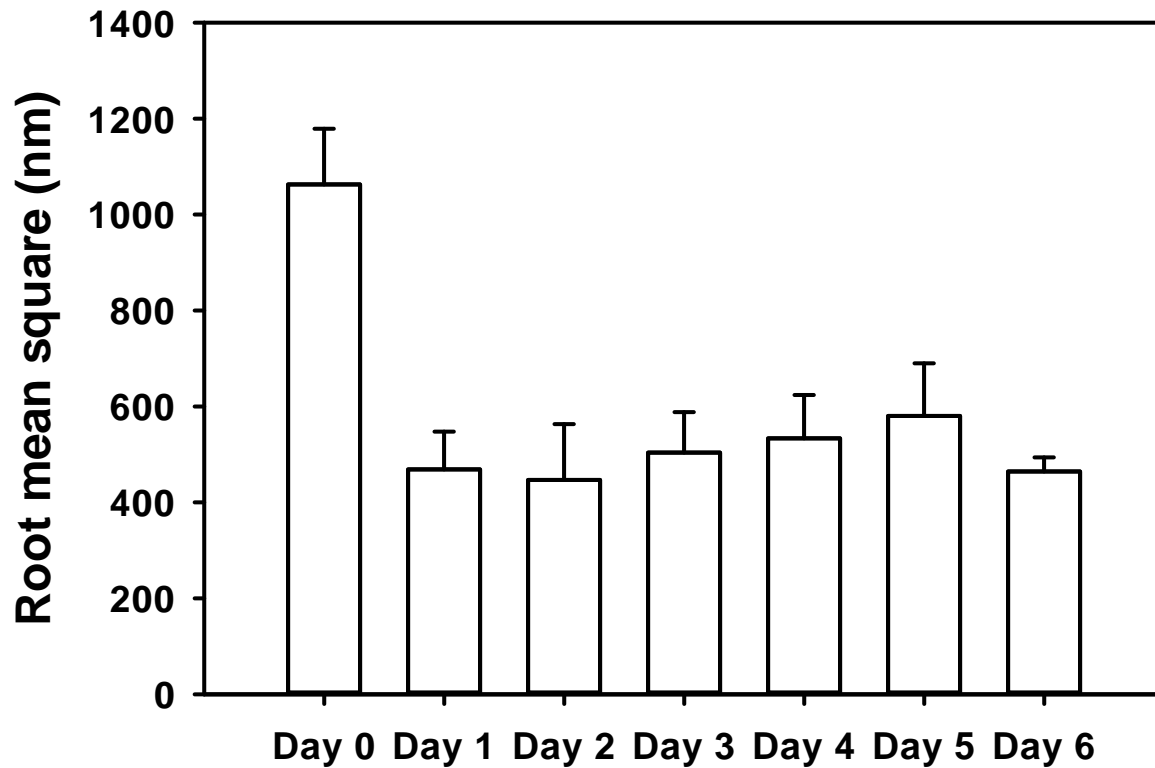

**Figure S3.** Root mean square (RMS) obtained from the height trace of AFM

**Video 1:** Captive bubble (air) tilting experiment on unstratified cells. The actual tilting rate is 0.5 deg/s. Movie is played at twice the frame rate (1 deg/s).

**Video 2:** Captive bubble (air) tilting experiment on stratified cultures (day 3). The actual tilting rate is 0.5 deg/s. Movie is played at twice the frame rate (1 deg/s).

**Video 3:** Sessile drop (perfluorodecalin) tilting experiment on unstratified cells. The actual tilting rate is 0.5 deg/s. Movie is played at twice the frame rate (1 deg/s).

**Video 4:** Sessile drop (perfluorodecalin) tilting experiment on stratified cultures (day 3). The actual tilting rate is 0.5 deg/s. Movie is played at twice the frame rate (1 deg/s).
